# Supplementary material for: Leucine Zipper-bearing Kinase promotes axon growth in mammalian central nervous system neurons
Source: PubMed Central journal article supplement (PMC4980599; doi:10.1038/srep31482), 2016-08-11

## Supplementary Information (SI)

### Leucine zipper-bearing kinase promotes axon growth in mammalian central nervous system neurons

Meifan Chen, Cédric G. Geoffroy, Hetty N. Wong, Oliver Tress, Mallorie T. Nguyen, Lawrence B. Holzman, Yishi Jin and Binhai Zheng

#### SI FIGURE LEGENDS

**Figure S1.** *LZK enhances axon extension and regeneration of cortical neurons.* (A) Cortical neurons isolated from E18.5 wild-type mice were transfected with the indicated pBI plasmids. EV is empty vector negative control. Images show GFP-positive hippocampal neurons indicative of transfection with pBI vectors. Scale bar = 25  $\mu\text{m}$ . (B) Boxplot quantifies the median values of total neurite lengths, of cortical neurons transfected with the indicated pBI vectors. Median values for each condition are shown within the graph. All boxplot edges extend to the 25<sup>th</sup> and 75<sup>th</sup> percentiles; whiskers extend to non-outliner extremes; points beyond whiskers represent outliers. p-values by Wilcoxon test;  $n > 100$  neurons per condition. (C) Representative images of regenerating axons from cortical neurons axotomized *in vitro* using microfluidic chambers (MFCs). Control indicates transfection with non-targeting siRNA (control); LZK-KD indicates transfection with a pool of four LZK-siRNAs. Scale bar is 100 $\mu\text{m}$ . Horizontal lines represent distances 250 $\mu\text{m}$  and 500 $\mu\text{m}$  away from the lesion site. (D) Average number of regenerating axons passing lines 250 $\mu\text{m}$  or 500 $\mu\text{m}$  from lesion site in MFCs.  $n > 780$  axons per condition. p-values by student's t-test. Standard error from replicates graphed. (E) Average density of regenerating axons in zone 1 (0-250 $\mu\text{m}$ ), zone 2 (250-500 $\mu\text{m}$ ), and zone 3 (500-750 $\mu\text{m}$ ) away from the lesion site in MFCs. Statistics done as in (D).

**Figure S2.** *JNK activity promotes LZK protein expression.* N2a cells were transfected with empty vector (EV) or FLAG-LZK and treated with JNK inhibitor SP600125 or p38 inhibitor SB203580 at the indicated doses at the time of transfection for 12h. Total cell lysates were immunoblotted for the indicated proteins. (A) p-cJun indicates phospho-(Ser63)-c-Jun. (B) p-P38 indicates phospho-(Thr180/Tyr182)-p38. Immunoblot-based quantification of signal intensity (S.I.) of protein levels normalized to that of  $\beta$ -actin is shown for FLAG and p-cJun.

**S1A**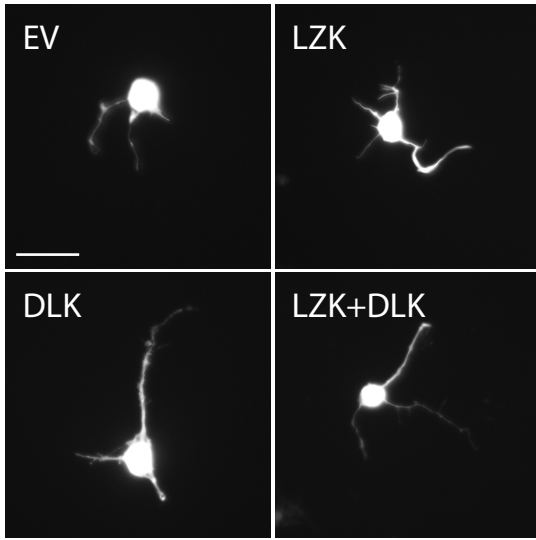**S1B**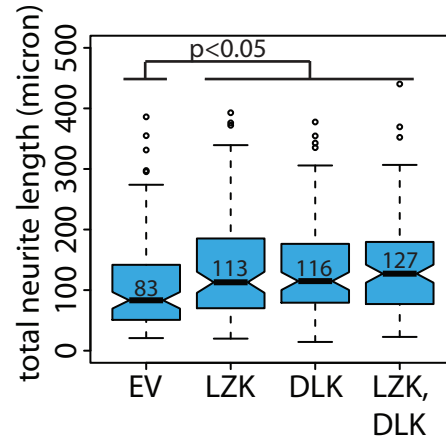**S1C**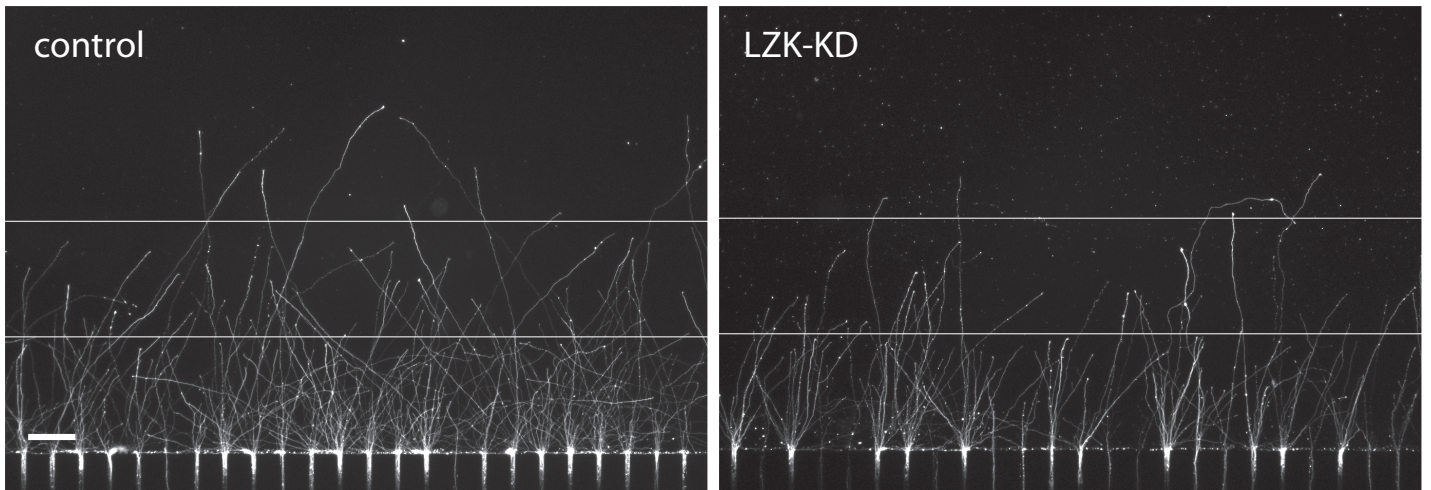**S1D**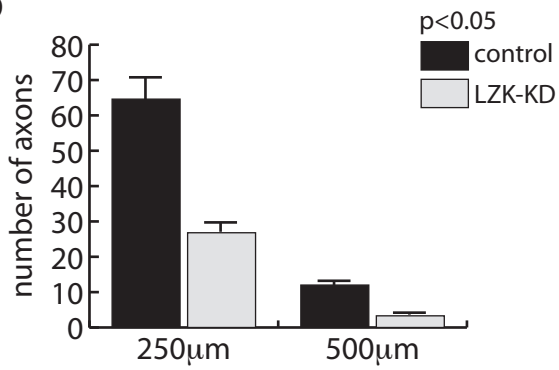**S1E**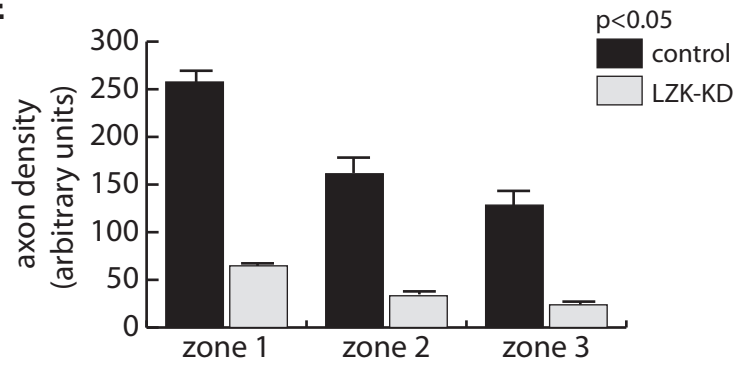

**S2A**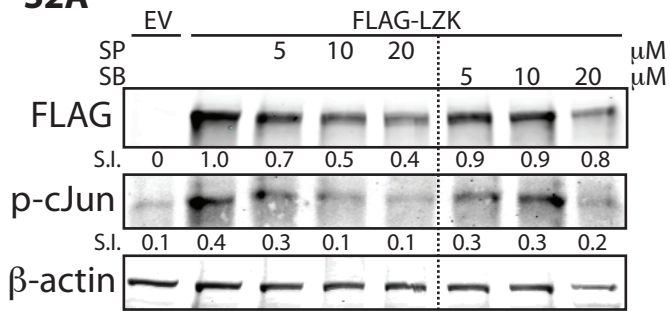**S2B**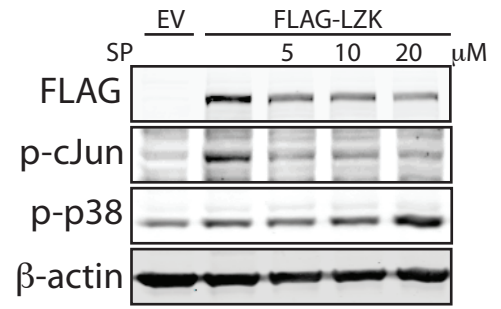

Supplement: srep31482-s1.pdf [file srep31482-s1.pdf]
